# Supplementary material for: Clinical Efficacy of Combined Surgical Patient Safety System and the World Health Organization’s Checklists in Surgery: A Nonrandomized Clinical Trial
Source: PubMed Central journal article supplement (PMC7221852; doi:10.1001/jamasurg.2020.0989), 2020-05-13
Supplement: jamasurg-155-562-s001.pdf [file jamasurg-155-562-s001.pdf]

1 ClinicalTrials.gov Identifier: NCT01872195

2  
3 **PROTOCOL:**

4 **Effects of Checklists in Surgical Care - a Study on Complications, Death and**  
5 **Quality of Patient Administrative Data**

6  
7 Detailed Description:

8 1.0 Background

9 Surgical procedures are high risk events and patients may suffer complications or die  
10 post operatively. A report from an on-going patient safety campaign "In Safe Hands"  
11 lead by the Norwegian Knowledge Centre for the Health Services reveals that  
12 approximately 16 % of all Norwegian hospital admissions in 2010 involved an  
13 adverse event (AE) (Deilkås, 2011). A review study on AEs in 2008 included a wide  
14 range of in-hospital patients from Australia, Canada, New Zealand, the United  
15 Kingdom, and the United States of America (US) (de Vries et al., 2008). 9 % of the  
16 patients experienced an AE, with 7. 4 % of these ending fatally. The majority of the  
17 AEs occurred during surgical treatment or was related to drug administration. The  
18 authors claimed that almost half of these could have been prevented if checklists  
19 covering the entire surgical pathway had been used (de Vries et al., 2008).  
20 Implementation of such a system, called the Surgical Patient Safety System  
21 (SURPASS) did in fact result in a reduction of in-hospital morbidity (from 27.3% to  
22 16.7%) and mortality (from 1.5 % to 0.8 %) (de Vries, 2010).

23 Patient safety checklists have been introduced and recommended as a standard of  
24 surgical care (Birkmeyer, 2010; de Vries et al., 2011). Studies based on data from  
25 electronic patient administrative systems show that checklist use may reduce  
26 mortality and morbidity in surgery (de Vries et al., 2010; van Klei et al., 2012; Haynes  
27 et al., 2009). Safe Surgery checklists have been recommended by the World Health  
28 Organization (WHO) since 2008 as a strategy to avoid adverse events (AE) during  
29 surgery. More than 6000 hospitals have implemented Safe Surgery checklists in their  
30 operating theatres (OTs) (<http://www.who.int/patientsafety/safesurgery/en/>), including  
31 Haukeland University Hospital (HUH).

32 This multicentre research project will also introduce a system of patient safety  
33 checklists at each point of care during the surgical patients' stay, not only in the  
34 operating theatres (OTs). The system combines new checklists on patient care (parts  
35 of SURPASS) with the already established Safe Surgery checklist (WHO) in the OTs.  
36 At the same time securing reliability, validity and quality of the patient, morbidity and  
37 mortality data will be an essential part of the study.

38 Today the discharging physician reviews the medical journal and makes a medical  
39 summary including coding diseases and complications relevant for the current  
40 admission. International Classification of Diseases (ICD-10) codes are used to set  
41 diagnoses for clinical, epidemiological and quality purposes  
42 ([http://www.who.int/classifications/icd/ICD10Volume2\\_en\\_2010.pdf](http://www.who.int/classifications/icd/ICD10Volume2_en_2010.pdf)). The ICD-10  
43 codes are also used for registrations on national mortality and morbidity in the  
44 Norwegian National Patient Register (NPR). Questions have been raised as to the  
45 accuracy and quality of the data in such registers in Norway, e.g. in patients with  
46 sepsis (Flaatten, 2004), and intensive care patients (Aardal et al., 2005). In a Danish

47 study on relations between ICD-10 coding in the National Registry of Patients and the  
48 hospitals' discharge summary and medical records, a high reliability between ICD-10  
49 scores and co-morbidity was found (Thygesen et al., 2011). To our knowledge similar  
50 studies have not been done in Norway. As a crucial part of this investigation we  
51 concurrently will evaluate the reliability and validity of our patient administrative data  
52 by comparing the post discharge ICD-10 codes to actual data available directly from  
53 medical journal systems as documented by health care personnel in the journal texts.

## 54 2.0 Objective

55 The main objectives of this study are to:

- 56• Perform a systematic review of published studies on effects of safety checklists in  
57 medicine.
- 58• Explore effects on morbidity and mortality after implementing a system of patient  
59 safety checklists at each point of care during the surgical patients' stay (elements of  
60 SURPASS and the WHO Safe Surgery list combined), in a cohort of surgical patients  
61 in different surgical departments in one hospital, with patients from departments not  
62 having the system introduced serving as controls from three hospitals.
- 63• Investigate the validity of the post discharge ICD-10 codes for complications  
64 compared to actual information found in medical journal systems texts.  
65       Discrepancies between patient information on complications registered as  
66       ICD-10 codes and information on complications documented in the actual  
67       electronic patient journal  
68       Registration of ICD-10 codes on complications and complications documented  
69       in the actual electronic patient journal will be registered separately and then  
70       compared as to discrepancies between these. This is done to evaluate and  
71       validate complication data (ICD-10 codes) used for primary outcome  
72       measures.

73 This project aims to produce a systematic review on present knowledge on effects of  
74 using safety checklists in medicine. Implementation of a checklist system throughout  
75 surgical care may reduce patient morbidity and mortality. The reliability of patient  
76 data is crucial to make firm conclusions as to such effects. This project aims to  
77 investigate if such morbidity and mortality effects are obtainable in two Norwegian  
78 hospitals while at the same time making a crucial evaluation of the patient data used  
79 in this study itself.

80 We hypothesise

- 81       1. An updated systematic review of the research literature provide evidence that  
82       safety checklists use does enhance safety and reduces patient mortality and  
83       morbidity
- 84       2. Implementation of the patient safety checklist system will reduce patient  
85       mortality and morbidity in the checklist cohort, and subsequent effects on  
86       length of stay
- 87       3. The sensitivity and specificity of ICD-10 coding vs. medical journal information  
88       is poor, with study results to be adjusted accordingly.

89  
90

91 3.0 Methods 3.1 The projects and design

92 1. Systematic review.

93 A systematic review on effects of safety checklists in medicine was done on  
94 May 29th, 2012 in the databases MEDLINE, Cochrane library, EMBASE and  
95 Web of Science, limited to only humans. The criteria were pre-set and  
96 included all time published quantitative studies in any language in the in-  
97 hospital and pre-hospital setting where safety checklists were the sole  
98 intervention, and effects of using checklists, generated as measurable  
99 outcomes. 7408 singular articles were found. To ensure the transparency of  
100 the reviewing process we used the PRISMA guidelines (Liberati et al., 2009).  
101 34 studies met our inclusion criteria. The majority of the included studies  
102 measured effects pre-and post-intervention and was classified as having an  
103 observational design. . This systematic review has identified that safety  
104 checklists can be effective safety tools in various clinical settings. Their use  
105 has reduced patient mortality and morbidity. In addition, safety checklist use  
106 has been associated with better human performance, improved compliance  
107 with evidence-based practices, promoted consistency of care, and reduction of  
108 technical omissions. None of the included studies reported that safety  
109 checklists have negative effects on patient safety issues.

110 2. Implement the new patient safety checklist system and measure effects on  
111 morbidity, mortality and length of hospital stay.

112 A prospective stepped wedge trial design (Brown & Lilford, 2006; Brown et al.,  
113 2008) will be used when implementing the validated patient safety checklist  
114 system in the Neurosurgical Department, the Orthopaedic Clinic and the  
115 Department of Gynaecology and Obstetrics at HUH. Patients from  
116 departments not using the patient safety checklist system serve as controls,  
117 this includes the Head and Neck Clinic (HUH), the Thoracic Surgery Section of  
118 the Heart Department (HUH) and two hospitals outside our own municipality  
119 (Health Trust Førde, and Health Trust Fonna - Haugesund Hospital). Primary  
120 end-points to be measured prospectively include length of hospital stay and  
121 morbidity and mortality utilizing the ICD-10 codes for complications collected  
122 electronically from the hospital patient administrative systems.

123 3. Validation of morbidity and mortality data.

124 Today ICD-10 codes are produced by discharging physicians to summarize  
125 diagnoses at discharge and any complications having occurred during patient  
126 stay. In order to validate HUH's and Health Trust Førde's ICD-10 coding on  
127 patient morbidity and mortality we will randomize inclusion for quality check  
128 comparing the ICD-10 codes used at discharge to all actual information on  
129 morbidity and mortality as documented in the electronic patient journal (EPJ) -  
130 DIPS. This validation should include approximately 700 patients, all having  
131 undergone major surgery. Such a comparison is essential to gain knowledge

132 on the quality of generated ICD-10 data and thus important to the quality of  
133 results in this study.

### 134 3.2 Intervention study sample

135 Three surgical units at HUH (Department of Neurosurgery, Orthopaedic Clinic, and  
136 Department of Gynaecology and Obstetrics) will have the checklist system  
137 implemented. Approximately 3700 patients will be included before and 3700 patients  
138 after checklist implementation. The Control Group includes 7400 patients.

### 139 3.4 Data collection

140 For the study on mortality and morbidity we will extract ICD-10 codes used at  
141 discharge from the hospitals NPR file, as all Norwegian hospitals report their ICD-10  
142 codes and procedure codes to NPR. In addition to registering all ICD-10 codes on  
143 each patient, we will collect demographic data (age, gender, height and weight),  
144 American Society of Anaesthesiologists Physical Health Classification (ASA), dates  
145 of admission and discharge, and all surgical procedures and major treatments. Data  
146 will be processed through Webport using a system previously developed locally for  
147 the WHO Surgical Safety Checklist project.

148 The primary end points, morbidity and mortality, are registered during hospitalization  
149 and postoperatively up to 30 days. Morbidity will be registered as major complications  
150 according to the American College of Surgeons' National Surgical Quality  
151 Improvement Program (<http://www.facs.org/cqi/outcomes.html>): organ/space surgical  
152 site infection, wound dehiscence, deep vein thrombosis, pulmonary embolism,  
153 pneumonia, re-intubation, ventilator use longer than 24 hours, cardiac arrest,  
154 myocardial infarction, sepsis, shock, coma longer than 24 hours, prosthetic/graft  
155 failure, and bleeding. Additional complications to these, as reported by de Vries  
156 (2010) will be included in order to make comparisons possible.

157 The study investigating reliability and validity of the ICD-10 codes will be done in  
158 detail: A prospective random selection of 700 patients, 200 patients from Health Trust  
159 Førde and 500 patients from the HUH, all having undergone major surgery. Present  
160 knowledge should suggest one or several major complications caused by procedures  
161 or iatrogenic causes in at least 17 % the surgical patients (de Vries, 2010). Then an  
162 inclusion of 700 patients is needed in order to find such complications in 119 cases.  
163 We will identify all post discharge ICD-10 codes for each patient. These codes will be  
164 thoroughly reviewed for accuracy and completeness by comparing to the actual  
165 information as documented by physicians and nurses in the EPJs throughout the  
166 total hospital stay. Primary outcome is here to investigate that registered ICD-10  
167 codes have adequate sensitivity and specificity compared to the information in the  
168 patients' medical journal.

### 169 3.5 Statistics

170 Descriptive and inferential statistical methods will be used to analyse data.  
171 Confidence intervals (95% CI) for sensitivity and specificity will be calculated using  
172 the normal approximation for the standard error of proportions.

173 Mortality and morbidity will be analysed as to time of measurement, e.g. pre and post  
 174 intervention, and surgical unit, i.e. using or not using the checklist. Multiple regression  
 175 analysis and other appropriate statistical tools will be used to adjust for covariates to  
 176 mortality and morbidity. Calculation of sample size and power, with an expected  
 177 mortality rate decrease (0.015 vs. 0.008) requires a sample size of 3641 patients in  
 178 both baseline and post intervention groups with an alpha (0.05, 2-tailed), power is  
 179 80%. To calculate sample size and power for morbidity mitigation from 27% to 17%  
 180 (de Vries et al., 2010) requires a much smaller sample size of 234 in baseline and  
 181 post intervention groups to constitute an 80% power with alpha at 0.05, 2-tailed.  
 182 Statistical analysis will be conducted with appropriate statistical software e.g.  
 183 Statistical Package for the Social Sciences, Stata or R.

184

Study Type : Interventional (Clinical Trial)

Actual Enrollment : 21000 participants

Allocation: Non-Randomized

Intervention Model: Parallel Assignment

Masking: None (Open Label)

Primary Purpose: Prevention

Official Title: Effects of Checklists in Surgical Care - a Study  
 on Morbidity, Mortality and Data Quality

Study Start Date : June 2013

Actual Primary Completion Date : March 2015

Actual Study Completion Date : March 2015

185

186 **Arms and Interventions**

187 Go to ▼

188 Top of Page Study Description Study Design Arms and Interventions Outcome

189 Measures Eligibility Criteria Contacts and Locations More Information

| Arm                                                                                       | Intervention/treatment                                                                                                                                                                                                                                                                                                                                                                                                          |
|-------------------------------------------------------------------------------------------|---------------------------------------------------------------------------------------------------------------------------------------------------------------------------------------------------------------------------------------------------------------------------------------------------------------------------------------------------------------------------------------------------------------------------------|
| Experimental: *<br>Before checklists<br>The comprehensive patient safety checklist system | Other: The comprehensive patient safety checklist system<br>The comprehensive patient safety checklist system follows each patient from admission to discharge with separate short checklists at each point of care: On admission to the hospital and ward (operating theatre nurse, ward doctor, surgeon, anaesthesiologist, ward nurse - 5 lists), in the operating theatre (here covered by the WHO-Safe Surgery checklist), |

|                                                                                               |                                                                                                                                                                                                                                                                                                                                                                                                                                                                                                                                               |
|-----------------------------------------------------------------------------------------------|-----------------------------------------------------------------------------------------------------------------------------------------------------------------------------------------------------------------------------------------------------------------------------------------------------------------------------------------------------------------------------------------------------------------------------------------------------------------------------------------------------------------------------------------------|
|                                                                                               | at the recovery/ICU unit (nurse- 1 list), at discharge from the hospital (ward doctor, ward nurse - 2 lists).                                                                                                                                                                                                                                                                                                                                                                                                                                 |
| Experimental: * After checklists<br>Without the comprehensive patient safety checklist system | Other: The comprehensive patient safety checklist system<br>The comprehensive patient safety checklist system follows each patient from admission to discharge with separate short checklists at each point of care: On admission to the hospital and ward (operating theatre nurse, ward doctor, surgeon, anaesthesiologist, ward nurse - 5 lists), in the operating theatre (here covered by the WHO-Safe Surgery checklist), at the recovery/ICU unit (nurse- 1 list), at discharge from the hospital (ward doctor, ward nurse - 2 lists). |

190  
191  
192  
193  
194  
195

**Outcome Measures**

Primary Outcome Measures :

1. Number of patients with complications or death, as a measure of checklist use  
[ Time Frame: One year ]

198  
199

Register number of patients with defined complications or peri- or postoperative death before and after checklist implementation.

200  
201

Secondary Outcome Measures :

1. Discrepancies between patient information on complications registered as ICD-10 codes and information on complications documented in the actual electronic patient journal [ Time Frame: One year ]

205  
206  
207  
208  
209

Registration of ICD-10 codes on complications and complications documented in the actual electronic patient journal will be registered separately and then compared as to discrepancies between these. This is done to evaluate and validate complication data (ICD-10 codes) used for primary outcome measures.

210

211  
212  
213

Other Outcome Measures:

1. Length of hospital stay (days) as a measure of checklist use.  
[ Time Frame: One year ]

216  
217

Length of hospital stay will be measured both before and after checklist use to evaluate if such use may have effects on hospital stay.

218

219 **Eligibility Criteria**

Ages Eligible for Study: Child, Adult, Older Adult  
Sexes Eligible for Study: All  
Accepts Healthy Volunteers: No

220 **Criteria**

221 Inclusion Criteria:

222• All patients undergoing a surgical procedure from the Orthopaedic Clinic, the  
223 Department of Gynaecology and Obstetrics and the Neurosurgical Department at  
224 Haukeland University Hospital.

225 Exclusion Criteria:

226• Radiology surgical interventions, donor surgery, out-patients and all patients who  
227 have made a written statement as to reservation to participate (use of patient data),  
228 and those who do not understand Norwegian spoken and written language will be  
229 excluded from data collection.

230

231

232 **Locations**

**Norway**

Haukeland University Hospital  
Bergen, Norway, 5021

233 **Sponsors and Collaborators**

234 Haukeland University Hospital

235 **Investigators**

Principal Investigator: Eirik Søfteland, MD, PhD Haukeland University Hospital

236

Responsible Party: Haukeland University Hospital

ClinicalTrials.gov Identifier: [NCT01872195](#) [History of Changes](#)

Other Study ID Numbers: REK Vest 2012/560  
Regional Health Authority ( Other Grant/Funding  
Number: 911755 )

First Posted: June 7, 2013 [Key Record Dates](#)

Last Update Posted: June 11, 2015

Last Verified: June 2015

237

238 Keywords provided by Haukeland University Hospital:

Checklist  
In-Hospital Mortality  
In-Hospital Morbidity

239

240

241



1 Supplemental Table Amendments made to the protocol regarding the checklist-  
 2 intervention study:  
 3

| Original                                                                                                                                                                                                                                                                                                                                                                  | Amendment                                                                                                                                                  | Time                  | Explanation                                                                                                        |
|---------------------------------------------------------------------------------------------------------------------------------------------------------------------------------------------------------------------------------------------------------------------------------------------------------------------------------------------------------------------------|------------------------------------------------------------------------------------------------------------------------------------------------------------|-----------------------|--------------------------------------------------------------------------------------------------------------------|
| Study Type:<br>Observational<br>(Patient Registry)<br>Primary Purpose:<br>Other<br>Interventional<br>Study Model:<br>Allocation: N/A                                                                                                                                                                                                                                      | Study Type:<br>Interventional<br>Primary Purpose:<br>Prevention<br>Interventional Study<br>Model: Parallel<br>Assignment<br>Allocation: Non-<br>Randomized | September<br>24, 2013 | Precision from<br>original protocol-<br>text                                                                       |
| Exclusion criteria:<br>When time to<br>complete the<br>checklist is<br>insufficient when<br>emergency<br>patients need<br>urgent assistance.                                                                                                                                                                                                                              | Radiology surgical<br>interventions, donor<br>surgery, outpatients, and<br>those who do not<br>understand Norwegian<br>spoken and written<br>language.     | March 19,<br>2014     | Precision                                                                                                          |
| Patients from<br>departments not<br>using the patient<br>safety checklist<br>system serve as<br>controls, this<br>includes the Head<br>and Neck Clinic<br>(HUH), the<br>Thoracic Surgery<br>Section of Heart<br>Department (HUH)<br>and two hospitals<br>outside our own<br>municipality<br>(Health Trust<br>Førde and Health<br>Trust Fonna –<br>Haugesund<br>hospital). | *The Head and Neck<br>Clinic (HUH) declined to<br>participate<br><br>*The Control group<br>includes 7400 patients                                          | May 11,<br>2015       | *Specifying the<br>number of patients<br>included from<br>Control hospitals.                                       |
| Enrollment: 7400<br>(Anticipated)                                                                                                                                                                                                                                                                                                                                         | 15000 (Actual)                                                                                                                                             | May 11,<br>2015       | *Actual numbers of<br>procedures<br>included was not<br>yet quality<br>checked, but<br>recruiting was<br>finished. |
| Enrolment: 7400<br>(Anticipated)                                                                                                                                                                                                                                                                                                                                          | 21000 (Actual)                                                                                                                                             | June 10,<br>2015      | *Actual numbers of<br>procedures                                                                                   |

|  |  |  |                                                                               |
|--|--|--|-------------------------------------------------------------------------------|
|  |  |  | included was not yet completely quality checked, but recruiting was finished. |
|--|--|--|-------------------------------------------------------------------------------|
