# Supplementary material for: Clinical Efficacy of Combined Surgical Patient Safety System and the World Health Organization’s Checklists in Surgery: A Nonrandomized Clinical Trial
Source: PubMed Central journal article supplement (PMC7221852; doi:10.1001/jamasurg.2020.0989), 2020-05-13
Supplement: jamasurg-155-562-s002.pdf [file jamasurg-155-562-s002.pdf]

## Supplementary Online Content

Storesund A, Haugen AS, Flaatten H, et al. Clinical efficacy of combined Surgical Patient Safety System and the World Health Organization's checklists in surgery: a nonrandomized clinical trial. *JAMA Surg*. Published online May 13, 2020. doi:10.1001/jamasurg.2020.0989

**eFigure.** CONSORT Flow Diagram

**eTable 1.** Characteristics of 9678 Surgical Procedures With Care as Usual Over 29 Months in 3 Control Hospitals in Western Norway From November 1, 2012, Through March 31, 2015

**eTable 2.** Characteristics of Outcomes in 9678 Surgical Procedures Over 29 Months in 3 Control Hospitals in Western Norway From November 1, 2012, Through March 31, 2015

**eTable 3.** Results From Logistic Regression of Change in 1 or More Verified Complications in 9669 Surgical Procedures With Care as Usual in 3 Hospitals in Western Norway Over 29 Months, From November 1, 2012, Through March 31, 2015

This supplementary material has been provided by the authors to give readers additional information about their work.

**eFigure. CONSORT Flow Diagram**

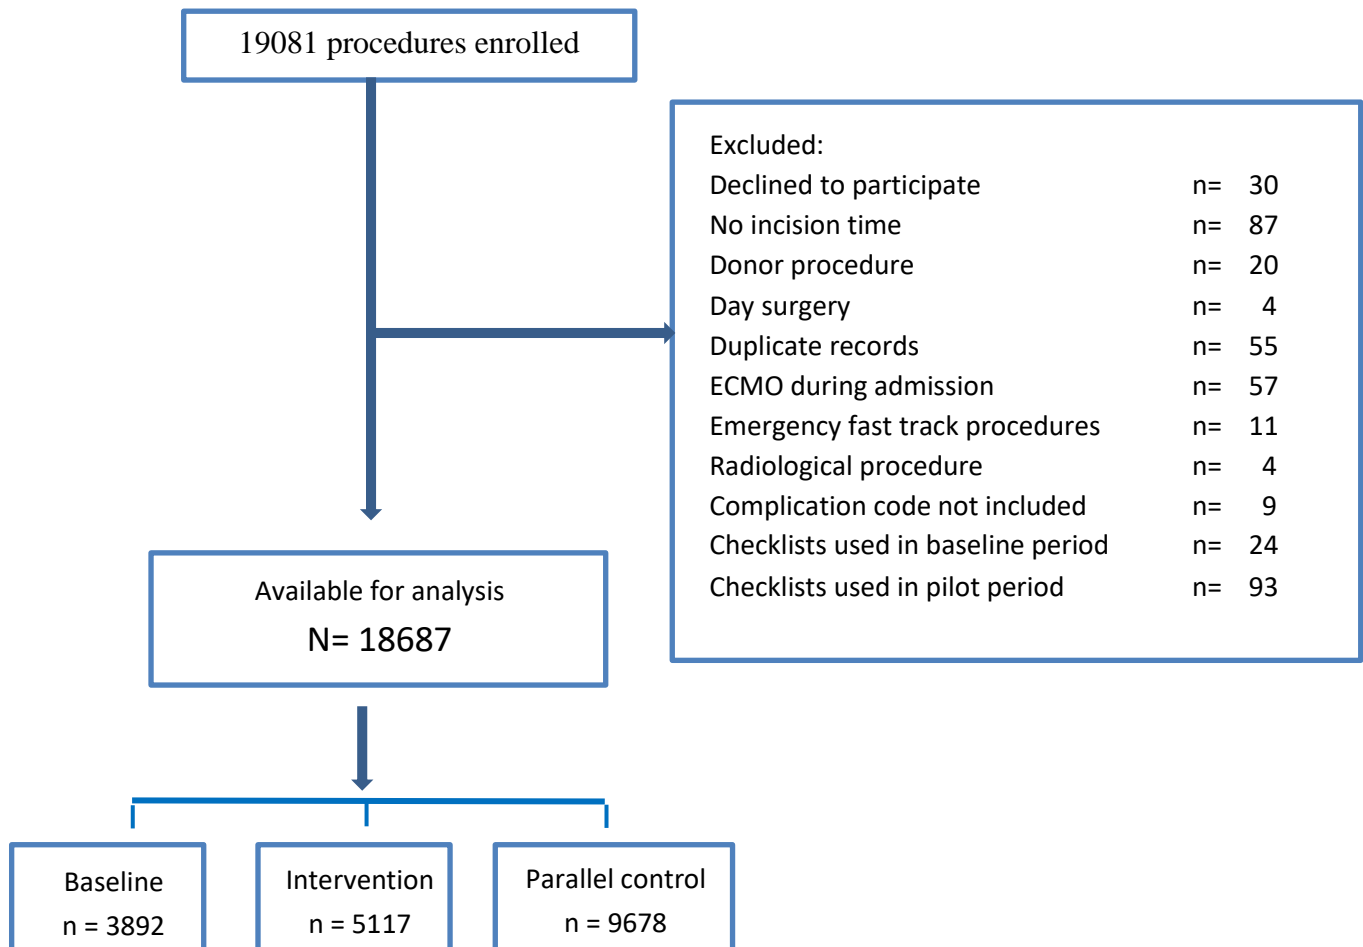

**eTable 1.** Characteristics of 9678 Surgical Procedures With Care as Usual Over 29 Months in 3 Control Hospitals in Western Norway From November 2012 Through March 2015

| Characteristic                         |             |
|----------------------------------------|-------------|
| Male sex, <i>n</i> (%)                 | 5554 (57.4) |
| Age (years), <i>mean</i> ( <i>SD</i> ) | 57.4 (22.2) |
| ASA <sup>b</sup> , <i>n</i> (%)        |             |
| I                                      | 1681 (17.4) |
| II                                     | 4294 (44.4) |
| III                                    | 3330 (34.4) |
| IV                                     | 356 (3.7)   |
| V                                      | 8 (0.1)     |
| Surgery, <i>n</i> (%)                  |             |
| Elective                               | 6146 (63.5) |
| Emergency                              | 3532 (36.5) |
| Anesthesia, <i>n</i> (%)               |             |
| Regional                               | 2510 (25.9) |
| General                                | 7168 (74.1) |
| Surgical specialty, <i>n</i> (%)       |             |
| Thoracic surgery <sup>c</sup>          | 2439 (25.2) |
| Central hospital I <sup>d</sup>        | 5863 (60.6) |
| Central hospital II <sup>e</sup>       | 1376 (14.2) |

*Abbreviations:* ASA = American Society of Anesthesiologists' risk score; SD = standard deviation;

a) Unique patients = 8121; b) 9 missing ASA scores. c) Tertiary hospital; d) (Fonna) General surgery, Vascular surgery, Orthopedics, Ear/Nose/Throat surgery, Urology; e) (Førde) General surgery, Vascular surgery, Urology, Gastrointestinal surgery.

**eTable 2.** Characteristics of Outcomes in 9678 Surgical Procedures Over 29 Months in 3 Control Hospitals in Western Norway From November 2012 Through March 2015

| Outcome                                                         | n (%)                          |
|-----------------------------------------------------------------|--------------------------------|
| Respiratory                                                     | 453 (4.7)                      |
| Pneumonia                                                       | 279 (2.9)                      |
| Respiratory other                                               | 222 (2.3)                      |
| Cardiac                                                         | 570 (5.9)                      |
| Cardiac arrhythmia                                              | 492 (5.1)                      |
| Congestive heart failure                                        | 46 (0.5)                       |
| Cardiac other                                                   | 48 (0.5)                       |
| Infections                                                      | 307 (3.2)                      |
| Sepsis                                                          | 31 (0.3)                       |
| Surgical site                                                   | 89 (0.9)                       |
| Urinary tract                                                   | 175 (1.8)                      |
| Infections other                                                | 19 (0.2)                       |
| Surgical wound rupture                                          | 30 (0.3)                       |
| Nervous system                                                  | 50 (0.5)                       |
| Delirium                                                        | 23 (0.2)                       |
| Cerebral infarction                                             | 29 (0.3)                       |
| Bleeding                                                        | 310 (3.2)                      |
| Embolism                                                        | 26 (0.3)                       |
| Nutrition                                                       | 114 (1.2)                      |
| Malnutrition                                                    | 24 (0.2)                       |
| Other disorders                                                 | 94 (1.0)                       |
| Anaesthesia                                                     | 7 (0.1)                        |
| Mechanical implantation                                         | 16 (0.2)                       |
| Fall                                                            | 0 (0.0)                        |
| Other                                                           | 155 (1.6)                      |
| Emergency reoperations                                          | 319 (3.3)                      |
| Readmission <sup>a)</sup>                                       | 212 (2.3)                      |
| Overall complications <sup>b)</sup>                             | 1993 (20.6)                    |
| Length of stay in days,<br>mean (SD)/median (IQR) <sup>a)</sup> | 6.5 (8.2)/<br>4.3 (2.1 to 8.1) |
| Mortality 30 days <sup>c)</sup>                                 | 88 (1.1)                       |
| in-hospital                                                     |                                |
| after discharge                                                 | 73 (0.9)                       |

Abbreviations: SD = standard deviation; IQR = interquartile range. a) n = 9027 admissions; b) Included in overall complications are 155 ICD-10 complication codes verified from unique surgical procedures, emergency reoperations and 30-day readmissions; c) 30 days or less from first operation on last hospital admission. n = 8121 patients.

**eTable 3.** Results From Logistic Regression of Change in 1 or More Verified Complications in 9669 Surgical Procedures With Care as Usual in 3 Hospitals in Western Norway Over 29 Months, From November 2012 Through March 2015

| Variables                         | Unadjusted models |              |         | Fully adjusted model |              |          |
|-----------------------------------|-------------------|--------------|---------|----------------------|--------------|----------|
|                                   | OR                | 95% CI       | P-value | OR                   | 95% CI       | P- value |
| Male sex                          | 1.21              | (1.09, 1.34) | < 0.001 | 0.98                 | (0.88, 1.10) | 0.729    |
| Age <sup>a)</sup>                 | 1.31              | (1.27, 1.35) | < 0.001 | 1.27                 | (1.22, 1.32) | < 0.001  |
| Month for operation <sup>b)</sup> | 1.08              | (1.01, 1.16) | 0.027   | 1.09                 | (1.01, 1.17) | 0.037    |
| ASA                               | 2.98              | (2.77, 3.21) | < 0.001 | 1.62                 | (1.47, 1.77) | < 0.001  |
| Urgency of surgery                |                   |              | 0.110   |                      |              | < 0.001  |
| Elective                          | 1.00              | reference    |         | 1.00                 | reference    |          |
| Emergency                         | 1.09              | (0.98, 1.20) |         | 1.75                 | (1.55, 1.97) |          |
| Anesthesia                        |                   |              | < 0.001 |                      |              | < 0.001  |
| General                           | 1.00              | reference    |         | 1.00                 | reference    |          |
| Regional                          | 0.54              | (0.48, 0.62) |         | 0.63                 | (0.54, 0.74) |          |
| Surgical specialty                |                   |              | < 0.001 |                      |              | < 0.001  |
| Thoracic surgery <sup>c)</sup>    | 1.00              | reference    |         | 1.00                 | reference    |          |
| Central hospital I <sup>d)</sup>  | 0.20              | (0.18, 0.22) |         | 0.27                 | (0.23, 0.31) |          |
| Central hospital II <sup>e)</sup> | 0.19              | (0.16, 0.22) |         | 0.24                 | (0.20, 0.29) |          |

*Abbreviations:* OR = Odds Ratio, effect size; CI = Confidence interval; P = p-value from likelihood ratio test; no adjustment for multiplicity; ASA = American Society of Anesthesiologists' risk score, scale: 1-5.

a) Per 10 years; b) Time point for inclusion in the study, per year; c) Tertiary hospital; d) (Fonna) General surgery, Vascular surgery, Orthopedics, Ear/Nose/Throat surgery, Urology; e) (Førde) General surgery, Vascular surgery, Urology, Gastrointestinal surgery.
